# Supplementary material for: DNA barcoding of euryglossine bees and the description of new species of Euhesma Michener (Hymenoptera, Colletidae, Euryglossinae)
Source: Zookeys. 2015 Sep 16;(520):41–59. doi: 10.3897/zookeys.520.6185 (PMC4591721; doi:10.3897/zookeys.520.6185)
Supplement: Supplementary material 1 — Type localities of new species [file zookeys-520-041-s001.xlsx]

## Sheet: Sheet1
SI Table 1. Type localities of new species.
species		lat	long	date	collection no.	locality	state	BOLD
Euhesma micans sp. nov. Hogendoorn & Leijs	♀	30.5250˚S	135.5917˚E	27 October 2010	SAMA 32-03385	Bon Bon Station	South Australia	AUSBS135-12
Euhesma micans sp. nov. Hogendoorn & Leijs	♂	30.5250˚S	135.5917˚E	27 October 2010	SAMA 32-03386	Bon Bon Station	South Australia	AUSBS136-12.
Euhesma lyngouriae sp. nov. Hogendoorn & Leijs	♀	30.2389˚S	135.5098˚E	26 October 2010	SAMA 32-033284	Bon Bon Station	South Australia	AUSBS137-12
Euhesma aulaca sp. nov. Hogendoorn & Leijs	♀	30.8440˚S	135.5389˚E	27 October 2010	SAMA 32-033281	Bon Bon Station	South Australia	AUSBS133-12
Euhesma aulaca sp. nov. Hogendoorn & Leijs	♂	30.8440˚S	135.5389˚E	27 October 2010	SAMA 32-033282	Bon Bon Station	South Australia
Euhesma aulaca sp. nov. Hogendoorn & Leijs	♀	30.7416˚S	135.3665˚E	27 October 2010		Bon Bon Station	South Australia	AUSBS131-12
Euhesma aulaca sp. nov. Hogendoorn & Leijs	♀	30.7416˚S	135.3665˚E	27 October 2010		Bon Bon Station	South Australia	AUSBS132-12
Euhesma aulaca sp. nov. Hogendoorn & Leijs	♀	30.7416˚S	135.3665˚E	27 October 2010		Bon Bon Station	South Australia	AUSBS134-12				2	4-12.
Euhesma albamala sp. nov. Hogendoorn & Leijs	♀	22.0936˚S	115.3507˚E	26 June 2011	RL1807C	Cane River Conservation Park	Western Australia	AUSBS082-12
Euhesma albamala sp. nov. Hogendoorn & Leijs	♂	22.0936˚S	115.3507˚E	26 June 2011	RL1811	Cane River Conservation Park	Western Australia	AUSBS009-12
Euhesma albamala sp. nov. Hogendoorn & Leijs	♀	22.0936˚S	115.3507˚E	26 June 2011	SAMA 32-033287	Cane River Conservation Park	Western Australia
Euhesma albamala sp. nov. Hogendoorn & Leijs	♀	22.0936˚S	115.3507˚E	26 June 2011	SAMA 32-033288	Cane River Conservation Park	Western Australia
Euhesma albamala sp. nov. Hogendoorn & Leijs	♀	22.0936˚S	115.3507˚E	26 June 2011	SAMA 32-033289	Cane River Conservation Park	Western Australia
Euhesma albamala sp. nov. Hogendoorn & Leijs	♀	22.0936˚S	115.3507˚E	26 June 2011	SAMA 32-033290	Cane River Conservation Park	Western Australia
